# Supplementary material for: Differences and similarities in the phytoplankton communities of two coupled transitional and marine ecosystems (the Lagoon of Venice and the Gulf of Venice - Northern Adriatic Sea)
Source: Frontiers journal article supplement (doi:10.3389/fmars.2022.974967), 2022-09-02
Supplement: Table_1.docx [file Table_1.docx]

Table S1. Floristic list of the 412 phytoplankton taxa recorded in this study. In the first column we report the presence of the taxa in each area, in the second in each season. Considering that some taxa could be present in both areas and in more than one season, the selection was made considering the station and the season where the maximum abundance was attained. LoV = Lagoon of Venice; GoV = Gulf of Venice. WIN (Winter) = January–March; SPR (Spring) = April–June; SUM (Summer) = July–September; AUT (Autumn) = October–December.

| **Area** | **Season** | **Taxa** | **Division** | |
| --- | --- | --- | --- | --- |
| **LoV** | **WIN** | *Achnanthes armillaris* | Bacillariophyceae | |
| **LoV** | **SPR** | *Achnanthes brevipes* | Bacillariophyceae | |
| **LoV** | **AUT** | *Achnanthes brockmannii* | Bacillariophyceae | |
| **LoV** | **SUM** | *Achnanthes* spp. | Bacillariophyceae | |
| **LoV** | **AUT** | *Achnanthes microcephala* | Bacillariophyceae | |
| **GoV** | **WIN** | *Achnanthidium minutissimus* | Bacillariophyceae | |
| **LoV** | **WIN** | *Amphipleura* spp. | Bacillariophyceae | |
| **LoV** | **SUM** | *Amphora binodis* | Bacillariophyceae | |
| **LoV** | **WIN** | *Amphora gravilleana* | Bacillariophyceae | |
| **LoV** | **WIN** | *Amphora laevissima* | Bacillariophyceae | |
| **LoV** | **AUT** | *Amphora lineolata* | Bacillariophyceae | |
| **GoV** | **SPR** | *Amphora obtusa* | Bacillariophyceae | |
| **LoV** | **SUM** | *Amphora peragalli* | Bacillariophyceae | |
| **LoV** | **SPR** | *Amphora* spp. < 20 µm | Bacillariophyceae | |
| **LoV** | **WIN** | *Amphora* spp. > 20 µm | Bacillariophyceae | |
| **GoV** | **SPR** | *Asterionella formosa* | Bacillariophyceae | |
| **GoV** | **AUT** | *Asterionellopsis glacialis* | Bacillariophyceae | |
| **GoV** | **SPR** | *Asteromphalus flabellatus* | Bacillariophyceae | |
| **LoV** | **WIN** | *Asteromphalus* spp. | Bacillariophyceae | |
| **GoV** | **SUM** | *Aulacoseira granulata* | Bacillariophyceae | |
| **GoV** | **SPR** | *Bacteriastrum furcatum* | Bacillariophyceae | |
| **GoV** | **SUM** | *Bacteriastrum hyalinum* | Bacillariophyceae | |
| **GoV** | **SPR** | *Bacteriastrum jadranum* | Bacillariophyceae | |
| **GoV** | **SPR** | *Bacteriastrum spp.* | Bacillariophyceae | |
| **GoV** | **WIN** | *Biddulphia biddulphiana* | Bacillariophyceae | |
| **LoV** | **SUM** | *Biddulphia sinensis* | Bacillariophyceae | |
| **GoV** | **SPR** | *Cerataulina pelagica* | Bacillariophyceae | |
| **GoV** | **SUM** | *Chaetoceros affinis* | Bacillariophyceae | |
| **GoV** | **SUM** | *Chaetoceros anastomosans* | Bacillariophyceae | |
| **GoV** | **AUT** | *Chaetoceros brevis* | Bacillariophyceae | |
| **LoV** | **SUM** | *Chaetoceros calcitrans* | Bacillariophyceae | |
| **GoV** | **SPR** | *Chaetoceros compressus* | Bacillariophyceae | |
| **GoV** | **SUM** | *Chaetoceros constrictus* | Bacillariophyceae | |
| **GoV** | **AUT** | *Chaetoceros costatus* | Bacillariophyceae | |
| **GoV** | **SUM** | *Chaetoceros curvisetus* | Bacillariophyceae | |
| **GoV** | **SUM** | *Chaetoceros dadayi* | Bacillariophyceae | |
| **GoV** | **AUT** | *Chaetoceros danicus* | Bacillariophyceae | |
| **GoV** | **SUM** | *Chaetoceros decipiens* | Bacillariophyceae | |
| **GoV** | **SPR** | *Chaetoceros diadema* | Bacillariophyceae | |
| **GoV** | **AUT** | *Chaetoceros didymus* | T6n 5br4ev3wc2 Bacillariophyceae | |
| **GoV** | **AUT** | *Chaetoceros diversus* | Bacillariophyceae | |
| **GoV** | **SUM** | *Chaetoceros laciniosus* | Bacillariophyceae | |
| **GoV** | **SUM** | *Chaetoceros lorenzianus* | Bacillariophyceae | |
| **LoV** | **SUM** | *Chaetoceros minimus* | Bacillariophyceae | |
| **GoV** | **AUT** | *Chaetoceros peruvianus* | Bacillariophyceae | |
| **GoV** | **SUM** | *Chaetoceros radicans* | Bacillariophyceae | |
| **GoV** | **AUT** | *Chaetoceros rostratus* | Bacillariophyceae | |
| **GoV** | **AUT** | *Chaetoceros similis* | Bacillariophyceae | |
| **GoV** | **SPR** | *Chaetoceros simplex* | Bacillariophyceae | |
| **GoV** | **SUM** | *Chaetoceros socialis* | Bacillariophyceae | |
| **GoV** | **SPR** | *Chaetoceros* sp.1 (single cells) | Bacillariophyceae | |
| **LoV** | **SUM** | *Chaetoceros* sp.2 | Bacillariophyceae | |
| **LoV** | **SUM** | *Chaetoceros* spp. | Bacillariophyceae | |
| **GoV** | **SUM** | *Chaetoceros teres* | Bacillariophyceae | |
| **GoV** | **AUT** | *Chaetoceros throndsenii* | Bacillariophyceae | |
| **GoV** | **SUM** | *Chaetoceros tortissimus* | Bacillariophyceae | |
| **LoV** | **SPR** | *Cocconeis placentula* | Bacillariophyceae | |
| **LoV** | **SUM** | *Cocconeis scutellum* | Bacillariophyceae | |
| **LoV** | **SPR** | *Cocconeis* spp. | Bacillariophyceae | |
| **LoV** | **WIN** | *Cocconeis stauroneiformis* | Bacillariophyceae | |
| **GoV** | **AUT** | *Coscinodiscus radiatus* | Bacillariophyceae | |
| **GoV** | **SPR** | *Coscinodiscus* spp. | Bacillariophyceae | |
| **LoV** | **SUM** | *Craticula cuspidata* | Bacillariophyceae | |
| **LoV** | **WIN** | *Craticula simplex* | Bacillariophyceae | |
| **GoV** | **SPR** | *Cyclotella caspia* | Bacillariophyceae | |
| **LoV** | **SUM** | *Cyclotella meneghiniana* | Bacillariophyceae | |
| **LoV** | **SPR** | *Cyclotella* spp. | Bacillariophyceae | |
| **LoV** | **SPR** | *Cyclotella* spp. > 10 µm | Bacillariophyceae | |
| **LoV** | **SUM** | *Cylindrotheca closterium* | Bacillariophyceae | |
| **LoV** | **SPR** | *Cymatopleura spp.* | Bacillariophyceae | |
| **GoV** | **AUT** | *Cymbella* spp. | Bacillariophyceae | |
| **GoV** | **AUT** | *Dactiliosolen mediterraneus* | Bacillariophyceae | |
| **GoV** | **SUM** | *Dactyliosolen blavyanus* | Bacillariophyceae | |
| **GoV** | **SUM** | *Dactyliosolen fragilissimus* | Bacillariophyceae | |
| **GoV** | **AUT** | *Dactyliosolen phuketensis* | Bacillariophyceae | |
| **GoV** | **AUT** | *Detonula pumila* | Bacillariophyceae | |
| **GoV** | **WIN** | *Diatoma vulgaris* | Bacillariophyceae | |
| **LoV** | **SPR** | *Diploneis bombus* | Bacillariophyceae | |
| **GoV** | **AUT** | *Diploneis crabro* | Bacillariophyceae | |
| **LoV** | **WIN** | *Diploneis interrupta* | Bacillariophyceae | |
| **GoV** | **WIN** | *Diploneis* spp. | Bacillariophyceae | |
| **GoV** | **WIN** | *Ditylum brightwellii* | Bacillariophyceae | |
| **LoV** | **WIN** | *Entomoneis alata* | Bacillariophyceae | |
| **LoV** | **WIN** | *Entomoneis paludosa* | Bacillariophyceae | |
| **LoV** | **SPR** | *Entomoneis* spp. | Bacillariophyceae | |
| **LoV** | **SPR** | *Eunotia* spp. | Bacillariophyceae | |
| **LoV** | **SPR** | *Fragilaria crotonensis* | Bacillariophyceae | |
| **GoV** | **SUM** | *Fragilaria* spp. | Bacillariophyceae | |
| **LoV** | **AUT** | *Gogorevia exilis* | Bacillariophyceae | |
| **LoV** | **AUT** | *Gomphonema olivacea* | Bacillariophyceae | |
| **LoV** | **AUT** | *Gomphonema parvulum* | Bacillariophyceae | |
| **LoV** | **SPR** | *Gomphonema* spp. | Bacillariophyceae | |
| **LoV** | **SPR** | *Grammatophora marina* | Bacillariophyceae | |
| **GoV** | **SUM** | *Guinardia flaccida* | Bacillariophyceae | |
| **GoV** | **SUM** | *Guinardia striata* | Bacillariophyceae | |
| **LoV** | **WIN** | *Gyrosigma fasciola* | Bacillariophyceae | |
| **LoV** | **SPR** | *Gyrosigma obscurum* | Bacillariophyceae | |
| **LoV** | **SPR** | *Gyrosigma* spp. | Bacillariophyceae | |
| **LoV** | **SUM** | *Halamphora coffeiformis* | Bacillariophyceae | |
| **LoV** | **SUM** | *Halamphora exigua* | Bacillariophyceae | |
| **LoV** | **SPR** | *Halamphora hyalina* | Bacillariophyceae | |
| **LoV** | **AUT** | *Halamphora normanii* | Bacillariophyceae | |
| **LoV** | **WIN** | *Halamphora veneta* | Bacillariophyceae | |
| **LoV** | **AUT** | *Hantzschia amphioxys* | Bacillariophyceae | |
| **LoV** | **SPR** | *Haslea ostrearia* | Bacillariophyceae | |
| **GoV** | **AUT** | *Hemiaulus hauckii* | Bacillariophyceae | |
| **GoV** | **AUT** | *Hemiaulus sinensis* | Bacillariophyceae | |
| **LoV** | **AUT** | *Hippodonta hungarica* | Bacillariophyceae | |
| **GoV** | **WIN** | *Lauderia annulata* | Bacillariophyceae | |
| **LoV** | **WIN** | *Lauderia* spp. | Bacillariophyceae | |
| **GoV** | **SUM** | *Leptocylindrus danicus* | Bacillariophyceae | |
| **LoV** | **SUM** | *Leptocylindrus minimus* | Bacillariophyceae | |
| **GoV** | **WIN** | *Leptocylindrus* spp. | Bacillariophyceae | |
| **LoV** | **SPR** | *Licmophora debilis* | Bacillariophyceae | |
| **LoV** | **AUT** | *Licmophora flabellata* | Bacillariophyceae | |
| **GoV** | **WIN** | *Licmophora gracilis* | Bacillariophyceae | |
| **LoV** | **SUM** | *Licmophora* spp. < 20 µm | Bacillariophyceae | |
| **LoV** | **WIN** | *Licmophora* spp. > 20 µm | Bacillariophyceae | |
| **GoV** | **SUM** | *Lioloma pacificum* | Bacillariophyceae | |
| **GoV** | **AUT** | *Liriogramma sarcophagus* | Bacillariophyceae | |
| **LoV** | **AUT** | *Luticula mutica* | Bacillariophyceae | |
| **LoV** | **SUM** | *Lyrella* spp. | Bacillariophyceae | |
| **LoV** | **SPR** | *Melosira moniliformis* | Bacillariophyceae | |
| **LoV** | **WIN** | *Melosira nummuloides* | Bacillariophyceae | |
| **LoV** | **WIN** | *Melosira* spp. | Bacillariophyceae | |
| **LoV** | **WIN** | *Melosira varians* | Bacillariophyceae | |
| **LoV** | **AUT** | *Navicula capitatoradiata* | Bacillariophyceae | |
| **LoV** | **SPR** | *Navicula cari* | Bacillariophyceae | |
| **LoV** | **WIN** | *Navicula cinta* | Bacillariophyceae | |
| **GoV** | **SUM** | *Navicula crucifera* | Bacillariophyceae | |
| **LoV** | **WIN** | *Navicula cryptocephala* | Bacillariophyceae | |
| **LoV** | **SPR** | *Navicula digitoradiata* | Bacillariophyceae | |
| **LoV** | **SPR** | *Navicula directa* | Bacillariophyceae | |
| **LoV** | **WIN** | *Navicula exigua* | Bacillariophyceae | |
| **LoV** | **SPR** | *Navicula flanatica* | Bacillariophyceae | |
| **LoV** | **AUT** | *Navicula globulifera* | Bacillariophyceae | |
| **LoV** | **AUT** | *Navicula gregaria* | Bacillariophyceae | |
| **LoV** | **SPR** | *Navicula lanceolata* | Bacillariophyceae | |
| **LoV** | **SPR** | *Navicula peregrina* | Bacillariophyceae | |
| **LoV** | **WIN** | *Navicula radiosa* | Bacillariophyceae | |
| **LoV** | **WIN** | *Navicula rhynchocephala* | Bacillariophyceae | |
| **LoV** | **WIN** | *Navicula rostellata* | Bacillariophyceae | |
| **LoV** | **WIN** | *Navicula salinarum* | Bacillariophyceae | |
| **LoV** | **SPR** | *Navicula* spp. < 20 µm | Bacillariophyceae | |
| **LoV** | **WIN** | *Navicula* spp. > 20 µm | Bacillariophyceae | |
| **LoV** | **WIN** | *Navicula tripuncata* | Bacillariophyceae | |
| **LoV** | **WIN** | *Navicula trivialis* | Bacillariophyceae | |
| **LoV** | **AUT** | *Navicula viridula* | Bacillariophyceae | |
| **GoV** | **SUM** | *Neidiomorpha binodis* | Bacillariophyceae | |
| **LoV** | **SPR** | *Neidium* spp. | Bacillariophyceae | |
| **GoV** | **AUT** | *Neomoelleria cornuta* | Bacillariophyceae | |
| **LoV** | **WIN** | *Nitzschia acicularis* | Bacillariophyceae | |
| **LoV** | **SUM** | *Nitzschia clausii* | Bacillariophyceae | |
| **LoV** | **SUM** | *Nitzschia frustulum* | Bacillariophyceae | |
| **LoV** | **AUT** | *Nitzschia gracilis* | Bacillariophyceae | |
| **LoV** | **SPR** | *Nitzschia hybrida* | Bacillariophyceae | |
| **LoV** | **WIN** | *Nitzschia incurva* | Bacillariophyceae | |
| **LoV** | **SPR** | *Nitzschia lanceolata* | Bacillariophyceae | |
| **LoV** | **SPR** | *Nitzschia linearis* | Bacillariophyceae | |
| **LoV** | **WIN** | *Nitzschia longissima* | Bacillariophyceae | |
| **LoV** | **WIN** | *Nitzschia lorenziana* | Bacillariophyceae | |
| **LoV** | **SPR** | *Nitzschia palea* | Bacillariophyceae | |
| **LoV** | **AUT** | *Nitzschia reversa* | Bacillariophyceae | |
| **LoV** | **WIN** | *Nitzschia scalpelliformis* | Bacillariophyceae | |
| **LoV** | **SUM** | *Nitzschia sigma* | Bacillariophyceae | |
| **GoV** | **SPR** | *Nitzschia spathulata* | Bacillariophyceae | |
| **LoV** | **SUM** | *Nitzschia* spp. < 20 µm | Bacillariophyceae | |
| **LoV** | **WIN** | *Nitzschia* spp. > 100 µm | Bacillariophyceae | |
| **LoV** | **SPR** | *Nitzschia* spp. > 20 µm | Bacillariophyceae | |
| **GoV** | **SPR** | *Odontella* spp. | Bacillariophyceae | |
| **LoV** | **SPR** | *Paralia sulcata* | Bacillariophyceae | |
| **LoV** | **SUM** | *Petrodictyon gemma* | Bacillariophyceae | |
| **LoV** | **SPR** | *Phaeodactylum tricornutum* | Bacillariophyceae | |
| **LoV** | **SUM** | *Placoneis elginensis* | Bacillariophyceae | |
| **GoV** | **WIN** | *Plagiotropis lepidoptera* | Bacillariophyceae | |
| **LoV** | **SPR** | *Pleurosigma aestuarii* | Bacillariophyceae | |
| **LoV** | **AUT** | *Pleurosigma formosum* | Bacillariophyceae | |
| **GoV** | **SUM** | *Pleurosigma normanii* | Bacillariophyceae | |
| **GoV** | **SUM** | *Pleurosigma* spp. | Bacillariophyceae | |
| **LoV** | **WIN** | *Prestauroneis protracta* | Bacillariophyceae | |
| **GoV** | **SUM** | *Proboscia alata* | Bacillariophyceae | |
| **LoV** | **SUM** | *Psammodictyon panduriforme* | Bacillariophyceae | |
| **GoV** | **SUM** | *Pseudo-nitzschia delicatissima* | Bacillariophyceae | |
| **GoV** | **AUT** | *Pseudo-nitzschia fraudulenta* | Bacillariophyceae | |
| **GoV** | **SUM** | *Pseudo-nitzschia galaxiae* | Bacillariophyceae | |
| **LoV** | **SUM** | *Pseudo-nitzschia galaxiae (medium-sized )* | Bacillariophyceae | |
| **LoV** | **SUM** | *Pseudo-nitzschia multiseries* | Bacillariophyceae | |
| **LoV** | **SUM** | *Pseudo-nitzschia multistriata* | Bacillariophyceae | |
| **GoV** | **SUM** | *Pseudo-nitzschia pseudodelicatissima complex* | Bacillariophyceae | |
| **GoV** | **WIN** | *Pseudo-nitzschia pungens* | Bacillariophyceae | |
| **GoV** | **AUT** | *Pseudo-nitzschia* spp. | Bacillariophyceae | |
| **GoV** | **AUT** | *Pseudo-nitzschia subfraudulenta* | Bacillariophyceae | |
| **GoV** | **AUT** | *Rhizosolenia hebetata f. semispina* | Bacillariophyceae | |
| **GoV** | **AUT** | *Rhizosolenia imbricata* | Bacillariophyceae | |
| **GoV** | **SPR** | *Rhizosolenia* spp. | Bacillariophyceae | |
| **LoV** | **SPR** | *Rhoicosphenia abbreviata* | Bacillariophyceae | |
| **LoV** | **WIN** | *Sellaphora pupula* | Bacillariophyceae | |
| **LoV** | **SPR** | *Seminavis cymbelloides* | Bacillariophyceae | |
| **LoV** | **AUT** | *Seminavis macilenta* | Bacillariophyceae | |
| **GoV** | **WIN** | *Skeletonema marinoi* | Bacillariophyceae | |
| **LoV** | **WIN** | *Skeletonema menzelii* | Bacillariophyceae | |
| **LoV** | **SUM** | *Skeletonema* spp. | Bacillariophyceae | |
| **LoV** | **SUM** | *Skeletonema tropicum* | Bacillariophyceae | |
| **GoV** | **SUM** | *Stauroneis* spp. | Bacillariophyceae | |
| **LoV** | **WIN** | *Staurosira inflata* | Bacillariophyceae | |
| **LoV** | **WIN** | *Striatella unipunctata* | Bacillariophyceae | |
| **LoV** | **WIN** | *Surirella librile* | Bacillariophyceae | |
| **LoV** | **SUM** | *Surirella minuta* | Bacillariophyceae | |
| **LoV** | **AUT** | *Surirella* spp. | Bacillariophyceae | |
| **LoV** | **AUT** | *Synedra* spp. < 20 µm | Bacillariophyceae | |
| **LoV** | **SPR** | *Synedra* spp. > 20 µm | Bacillariophyceae | |
| **LoV** | **WIN** | *Tabularia affinis* | Bacillariophyceae | |
| **LoV** | **WIN** | *Tabularia gaillonii* | Bacillariophyceae | |
| **LoV** | **SUM** | *Tabularia tabulata* | Bacillariophyceae | |
| **GoV** | **SPR** | *Thalassionema nitzschioides* | Bacillariophyceae | |
| **GoV** | **WIN** | *Thalassiosira angulata* | Bacillariophyceae | |
| **GoV** | **AUT** | *Thalassiosira gravida* | Bacillariophyceae | |
| **LoV** | **SPR** | *Thalassiosira nordenskioldii* | Bacillariophyceae | |
| **LoV** | **SUM** | *Thalassiosira pseudonana* | Bacillariophyceae | |
| **LoV** | **SUM** | *Thalassiosira* spp. < 10 µm | Bacillariophyceae | |
| **LoV** | **SPR** | *Thalassiosira* spp. > 10 µm | Bacillariophyceae | |
| **LoV** | **WIN** | *Tropidoneis* spp. | Bacillariophyceae | |
| **LoV** | **SPR** | *Tryblionella apiculata* | Bacillariophyceae | |
| **LoV** | **AUT** | *Tryblionella coarctata* | Bacillariophyceae | |
| **LoV** | **SPR** | *Tryblionella hungarica* | Bacillariophyceae | |
| **LoV** | **AUT** | *Tryblionella punctata* | Bacillariophyceae | |
| **LoV** | **AUT** | *Tryblionella* spp. | Bacillariophyceae | |
| **GoV** | **SPR** | *Ulnaria acus* | Bacillariophyceae | |
| **LoV** | **WIN** | *Ulnaria ulna* | Bacillariophyceae | |
| **LoV** | **SUM** | Undetermined centric diatoms <10 µm | Bacillariophyceae | |
| **LoV** | **AUT** | Undetermined centric diatoms >10 µm | Bacillariophyceae | |
| **LoV** | **SPR** | Undetermined Pennate diatoms < 20 µm | Bacillariophyceae | |
| **LoV** | **SPR** | Undetermined Pennate diatoms > 20 µm | Bacillariophyceae | |
| **GoV** | **SPR** | *Alexandrium minutum* | Dinophyceae | |
| **LoV** | **SUM** | *Alexandrium* spp. | Dinophyceae | |
| **GoV** | **SUM** | *Amphidinium crassum* | Dinophyceae | |
| **GoV** | **SUM** | *Amphidinium sphenoides* | Dinophyceae | |
| **GoV** | **SPR** | *Amphidinium* spp. | Dinophyceae | |
| **GoV** | **AUT** | *Cochlodinium pulchellum* | Dinophyceae | |
| **GoV** | **AUT** | *Cochlodinium* spp. | Dinophyceae | |
| **GoV** | **AUT** | *Dinophysis fortii* | Dinophyceae | |
| **LoV** | **SUM** | *Dinophysis sacculus* | Dinophyceae | |
| **GoV** | **SPR** | *Diplopsalis group* | Dinophyceae | |
| **GoV** | **WIN** | *Ensiculifera carinata* | Dinophyceae | |
| **GoV** | **SPR** | *Gonyaulax spinifera* | Dinophyceae | |
| **GoV** | **SUM** | *Gonyaula*x spp. | Dinophyceae | |
| **LoV** | **SUM** | *Gymnodinium* spp. < 20 µm | Dinophyceae | |
| **LoV** | **SUM** | *Gymnodinium* spp. > 20 µm | Dinophyceae | |
| **GoV** | **WIN** | *Gyrodinium flagellare* | Dinophyceae | |
| **GoV** | **AUT** | *Gyrodinium fusiforme* | Dinophyceae | |
| **GoV** | **SUM** | *Gyrodinium spirale* | Dinophyceae | |
| **GoV** | **SPR** | *Gyrodinium* spp. | Dinophyceae | |
| **GoV** | **SUM** | *Gyrodinium* spp. < 20 µm | Dinophyceae | |
| **GoV** | **SUM** | *Gyrodinium* spp. > 20 µm | Dinophyceae | |
| **GoV** | **SPR** | *Heterocapsa minima* | Dinophyceae | |
| **GoV** | **SPR** | *Heterocapsa niei* | Dinophyceae | |
| **GoV** | **AUT** | *Heterocapsa rotundata* | Dinophyceae | |
| **GoV** | **SPR** | *Heterocapsa* spp. | Dinophyceae | |
| **GoV** | **SUM** | *Heterocapsa triquetra* | Dinophyceae | |
| **GoV** | **SPR** | *Karenia brevis* | Dinophyceae | |
| **GoV** | **AUT** | *Karenia mikimotoi* | Dinophyceae | |
| **GoV** | **SPR** | *Karenia papilionacea* | Dinophyceae | |
| **GoV** | **SPR** | *Karenia selliformis* | Dinophyceae | |
| **GoV** | **WIN** | *Karenia* spp. | Dinophyceae | |
| **GoV** | **SUM** | *Katodinium glaucum* | Dinophyceae | |
| **GoV** | **SPR** | *Lessardia elongata* | Dinophyceae | |
| **GoV** | **SUM** | *Lingulodinium polyedrum* | Dinophyceae | |
| **GoV** | **SPR** | *Mesoporos perforatus* | Dinophyceae | |
| **GoV** | **WIN** | *Micracanthodinium claytonii* | Dinophyceae | |
| **GoV** | **SUM** | *Oxytoxum caudatum* | Dinophyceae | |
| **GoV** | **SPR** | *Oxytoxum longum* | Dinophyceae | |
| **GoV** | **SUM** | *Oxytoxum variabile* | Dinophyceae | |
| **GoV** | **SUM** | *Oxytoxum viride* | Dinophyceae | |
| **LoV** | **SUM** | *Peridinium quinquecorne* | Dinophyceae | |
| **GoV** | **SUM** | *Pronoctiluca spinifera* | Dinophyceae | |
| **GoV** | **SUM** | *Prorocentrum compressum* | Dinophyceae | |
| **GoV** | **SUM** | *Prorocentrum dactylus* | Dinophyceae | |
| **GoV** | **SPR** | *Prorocentrum donghaiense* | Dinophyceae | |
| **GoV** | **SPR** | *Prorocentrum gracile* | Dinophyceae | |
| **GoV** | **SPR** | *Prorocentrum micans* | Dinophyceae | |
| **GoV** | **SPR** | *Prorocentrum minimum* | Dinophyceae | |
| **LoV** | **SUM** | *Prorocentrum rhathymum* | Dinophyceae | |
| **GoV** | **AUT** | *Prorocentrum* spp. | Dinophyceae | |
| **LoV** | **SPR** | *Prorocentrum triestinum* | Dinophyceae | |
| **GoV** | **SUM** | *Prorocentrum vaginulum* | Dinophyceae | |
| **GoV** | **SPR** | *Protoceratium reticulatum* | Dinophyceae | |
| **GoV** | **WIN** | *Protoperidinium bipes* | Dinophyceae | |
| **LoV** | **SUM** | *Protoperidinium brevipes* | Dinophyceae | |
| **GoV** | **SPR** | *Protoperidinium cerasus* | Dinophyceae | |
| **GoV** | **SPR** | *Protoperidinium conicum* | Dinophyceae | |
| **GoV** | **SPR** | *Protoperidinium diabolum* | Dinophyceae | |
| **GoV** | **AUT** | *Protoperidinium oviforme* | Dinophyceae | |
| **GoV** | **AUT** | *Protoperidinium ovum* | Dinophyceae | |
| **GoV** | **SPR** | *Protoperidinium pellucidum* | Dinophyceae | |
| **GoV** | **SUM** | *Protoperidinium pyriforme* | Dinophyceae | |
| **GoV** | **SUM** | *Protoperidinium* spp. | Dinophyceae | |
| **GoV** | **SPR** | *Protoperidinium steinii* | Dinophyceae | |
| **GoV** | **SPR** | *Pyrophacus* spp. | Dinophyceae | |
| **GoV** | **SPR** | *Scrippsiella spinifera* | Dinophyceae | |
| **GoV** | **SPR** | *Scrippsiella* spp. | Dinophyceae | |
| **GoV** | **SPR** | *Scrippsiella trochoidea* | Dinophyceae | |
| **GoV** | **SUM** | *Torodinium robustum* | Dinophyceae | |
| **GoV** | **AUT** | *Tripos candelabrum* | Dinophyceae | |
| **GoV** | **AUT** | *Tripos furca* | Dinophyceae | |
| **GoV** | **SPR** | *Tripos fusus* | Dinophyceae | |
| **GoV** | **AUT** | *Tripos lineatus* | Dinophyceae | |
| **GoV** | **SUM** | *Tripos macroceros* | Dinophyceae | |
| **LoV** | **SUM** | Undetermined naked Dinophyceae < 20 µm | Dinophyceae | |
| **GoV** | **SUM** | Undetermined naked Dinophyceae > 20 µm | Dinophyceae | |
| **GoV** | **SPR** | Undetermined thecate Dinophyceae < 20 µm | Dinophyceae | |
| **LoV** | **WIN** | Undetermined thecate Dinophyceae > 20 µm | Dinophyceae | |
| **GoV** | **AUT** | *Acanthoica quattrospina* | Coccolitophyceae | |
| **GoV** | **WIN** | *Acanthoica* spp. | Coccolitophyceae | |
| **GoV** | **SUM** | *Calciopappus caudatus* | Coccolitophyceae | |
| **GoV** | **AUT** | *Calciosolenia brasiliensis* | Coccolitophyceae | |
| **GoV** | **SUM** | *Calciosolenia murrayi* | Coccolitophyceae | |
| **GoV** | **SPR** | *Calyptrolithophora papillifera* | Coccolitophyceae | |
| **GoV** | **SPR** | *Calyptrolithophora spp.* | Coccolitophyceae | |
| **GoV** | **SPR** | *Calyptrosphaera oblonga* | Coccolitophyceae | |
| **GoV** | **SPR** | *Calyptrosphaera sphaeroidea* | Coccolitophyceae | |
| **GoV** | **SPR** | *Calyptrosphaera* spp. | Coccolitophyceae | |
| **GoV** | **SPR** | *Corisphaera gracilis* | Coccolitophyceae | |
| **GoV** | **SUM** | *Corisphaera* spp. | Coccolitophyceae | |
| **GoV** | **WIN** | *Coronosphaera mediterranea* | Coccolitophyceae | |
| **GoV** | **SPR** | *Daktylethra pirus* | Coccolitophyceae | |
| **GoV** | **WIN** | *Emiliania huxleyi* | Coccolitophyceae | |
| **GoV** | **SUM** | *Halopappus* spp. | Coccolitophyceae | |
| **GoV** | **SUM** | *Helladosphaera cornifera* | Coccolitophyceae | |
| **GoV** | **SUM** | *Michaelsarsia adriatica* | Coccolitophyceae | |
| **GoV** | **AUT** | *Ophiaster hydroideus* | Coccolitophyceae | |
| **GoV** | **SUM** | *Rhabdolithes claviger* | Coccolitophyceae | |
| **GoV** | **AUT** | *Solisphaera* spp. | Coccolitophyceae | |
| **GoV** | **AUT** | *Syracosphaera pulchra* | Coccolitophyceae | |
| **GoV** | **SPR** | Undetermined Coccolitophorids | Coccolitophyceae | |
| **GoV** | **WIN** | *Teleaulax acuta* | Cryptophyceae | |
| **GoV** | **SPR** | Undetermined *Cryptophyceae* | Cryptophyceae | |
| **GoV** | **SPR** | *Leucocryptos marina* | Katablepharidophyceae | |
| **GoV** | **WIN** | *Dinobryon coalescens* | Crysophyceae | |
| **GoV** | **SPR** | *Dinobryon faculiferum* | Crysophyceae | |
| **GoV** | **WIN** | *Dinobryon* spp. | Crysophyceae | |
| **GoV** | **SPR** | *Ollicola vangoorii* | Crysophyceae | |
| **GoV** | **SPR** | Undetermined *Chrysophyceae* | Crysophyceae | |
| **GoV** | **AUT** | *Meringosphaera mediterranea* | Xantophyceae | |
| **LoV** | **SUM** | *Ankistrodesmus falcatus* | Chlorophyceae | |
| **LoV** | **SPR** | *Ankistrodesmus* spp. | Chlorophyceae | |
| **LoV** | **SPR** | *Asterothrix longispina* | Chlorophyceae | |
| **LoV** | **AUT** | *Characium* spp. | Chlorophyceae | |
| **GoV** | **AUT** | *Closteriopsis longissima* | Chlorophyceae | |
| **LoV** | **SPR** | *Coelastrum* spp. | Chlorophyceae | |
| **LoV** | **AUT** | *Desmodesmus flavescens* | Chlorophyceae | |
| **LoV** | **WIN** | *Desmodesmus opoliensis* var*. carinatus* | Chlorophyceae | |
| **GoV** | **SUM** | *Diplostauron pentagonium* | Chlorophyceae | |
| **LoV** | **SPR** | *Kirchneriella lunaris* | Chlorophyceae | |
| **LoV** | **WIN** | *Monactinus simplex* | Chlorophyceae | |
| **LoV** | **SUM** | *Monoraphidium contortum* | Chlorophyceae | |
| **LoV** | **AUT** | *Monoraphidium convolutum* | Chlorophyceae | |
| **LoV** | **SPR** | *Monoraphidium* spp. | Chlorophyceae | |
| **LoV** | **SUM** | *Pediastrum duplex* | Chlorophyceae | |
| **LoV** | **SUM** | *Scenedesmus quadricauda* | Chlorophyceae | |
| **LoV** | **SPR** | *Scenedesmus* spp. | Chlorophyceae | |
| **LoV** | **SPR** | *Schroederia setigera* | Chlorophyceae | |
| **LoV** | **SUM** | *Tetradesmus dimorphus* | Chlorophyceae | |
| **LoV** | **SPR** | *Tetradesmus legerheimii* | Chlorophyceae | |
| **LoV** | **SPR** | *Tetradesmus obliquus* | Chlorophyceae | |
| **LoV** | **SPR** | *Tetraedron* spp. | Chlorophyceae | |
| **LoV** | **SUM** | *Tetrastrum* spp. | Chlorophyceae | |
| **LoV** | **SPR** | Undetermined *Chlorophyceae* | Chlorophyceae | |
| **LoV** | **WIN** | *Actinastrum* spp. | Trebuxiophyceae | |
| **LoV** | **SUM** | *Chodatella* spp. | Trebuxiophyceae | |
| **LoV** | **SUM** | *Crucigenia* spp. | Trebuxiophyceae | |
| **LoV** | **SPR** | *Lagerheimia quadriseta* | Trebuxiophyceae | |
| **LoV** | **SPR** | *Lemmermannia tetrapedia* | Trebuxiophyceae | |
| **LoV** | **SUM** | *Micractinium bornhemiense* | Trebuxiophyceae | |
| **LoV** | **SPR** | *Micractinium pusillum* | Trebuxiophyceae | |
| **LoV** | **SUM** | *Micractinium* spp. | Trebuxiophyceae | |
| **LoV** | **SUM** | *Oocystis* spp. | Trebuxiophyceae | |
| **LoV** | **SPR** | *Willea rectangularis* | Trebuxiophyceae | |
| **LoV** | **AUT** | *Closterium* spp. | Zignematophyceae | |
| **LoV** | **SPR** | *Mougeotia* spp. | Zignematophyceae | |
| **GoV** | **SPR** | *Euglena gracilis* | Euglenophyceae | |
| **LoV** | **WIN** | *Eutreptia globulifera* | Euglenophyceae | |
| **LoV** | **SPR** | *Eutreptia lanowii* | Euglenophyceae | |
| **LoV** | **WIN** | *Eutreptiella marina* | Euglenophyceae | |
| **LoV** | **SPR** | Undetermined *Euglenophyceae* | Euglenophyceae | |
| **GoV** | **SUM** | *Cymbomonas tetramitiformis* | Pyramimonadophyceae | |
| **GoV** | **SPR** | *Pterosperma undulatum* | Pyramimonadophyceae | |
| **GoV** | **SUM** | *Pyramimonas longicauda* | Pyramimonadophyceae | |
| **LoV** | **SUM** | *Pyramimonas* spp. | Pyramimonadophyceae | |
| **GoV** | **SPR** | *Tasmanites marshalliae* | Pyramimonadophyceae | |
| **GoV** | **SUM** | *Tasmanites* spp. | Pyramimonadophyceae | |
| **LoV** | **SUM** | *Tetraselmis* spp. | Chlorodendrophyceae | |
| **GoV** | **SUM** | *Braarudosphaera bigelowii* | Prymnesiophyceae | |
| **GoV** | **SUM** | *Chrysochromulina* spp. | Prymnesiophyceae | |
| **GoV** | **SPR** | Undetermined *Prymnesiophyceae* | Prymnesiophyceae | |
| **LoV** | **SPR** | *Apedinella spinifera* | Dictyochophyceae | |
| **GoV** | **WIN** | *Dictyocha fibula* | Dictyochophyceae | |
| **GoV** | **AUT** | *Dictyocha fibula* var. *pentagona* | Dictyochophyceae | |
| **GoV** | **WIN** | *Octactis octonaria* | Dictyochophyceae | |
| **GoV** | **AUT** | *Octactis speculum* | Dictyochophyceae | |
| **LoV** | **WIN** | *Pseudopedinella pyriformis* | Dictyochophyceae | |
| **GoV** | **SUM** | *Hermesinum adriaticum* | Thecofilosea | |
| **LoV** | **SPR** | *Ebria tripartita* | Thecofilosea | |
| **LoV** | **SUM** | *Anabaena* spp. | Cyanophyceae | |
| **LoV** | **SUM** | *Oscillatoria* spp. | Cyanophyceae | |
| **LoV** | **AUT** | *Pseudanabaena limnetica* | Cyanophyceae | |
| **LoV** | **WIN** | *Pseudanabaena* spp. | Cyanophyceae | |
| **LoV** | **SUM** | *Spirulina* spp. | Cyanophyceae | |
| **LoV** | **SPR** | Undetermined *Cyanophyceae* | Cyanophyceae | |
| **LoV** | **SUM** | *Paulinella ovalis* | Filosa |  |
| **LoV** | **SPR** | *Commation cryoporinum* | Rhaphidophyceae | |
| **GoV** | **SPR** | *Heterosigma* spp. | Rhaphidophyceae | |
| **LoV** | **WIN** | Undetermined *Raphydophyceae* | Rhaphidophyceae | |
| **LoV** | **SUM** | Nanoflagellates |  |  |
